# Supplementary material for: Recessive missense LAMP3 variant associated with defect in lamellar body biogenesis and fatal neonatal interstitial lung disease in dogs
Source: PLoS Genet. 2020 Mar 9;16(3):e1008651. doi: 10.1371/journal.pgen.1008651 (PMC7082050; doi:10.1371/journal.pgen.1008651)
Supplement: S7 Table — (XLSX) [file pgen.1008651.s007.xlsx]

## Sheet: Sheet 1
S7 Table. Prevalence of the LAMP3 g.16,092,728C>T variant in 6940 dogs from 279 breeds and breed variants.
Breed	C/C	C/T
Airedale Terrier	8	1
Border Collie	570	0
Australian Shepherd	340	0
Lagotto Romagnolo - Romagna Water Dog	318	0
French Bulldog	296	0
Shetland Sheepdog	235	0
Labrador Retriever	196	0
Staffordshire Bull Terrier	141	0
Portuguese Water Dog	137	0
German Shepherd Dog	136	0
Miniature American Shepherd	124	0
Swedish Vallhund	123	0
Collie Rough	122	0
Parson Russell Terrier	120	0
Karelian Bear Dog	116	0
English Cocker Spaniel	95	0
Saarlooswolfdog	92	0
Rhodesian Ridgeback	92	0
Golden Retriever	92	0
Cavalier King Charles Spaniel	85	0
Belgian Shepherd Dog	78	0
Havanese	77	0
Barbet	77	0
Whippet	71	0
Norwegian Elkhound, Grey	70	0
Collie Smooth	69	0
Saluki	66	0
Finnish Lapphund	65	0
Danish-Swedish Farmdog	65	0
East-Siberian Laika	63	0
Tamaskan Dog	61	0
Irish Soft Coated Wheaten Terrier	59	0
Poodle - Standard (AKC size standard)	59	0
Deutsch Kurzhaar - German Shorthaired Pointer	58	0
Lapponian Herder	57	0
White Swiss Shepherd Dog	54	0
Dachshund - Miniature Longhaired	51	0
Samoyed	51	0
Tibetan Spaniel	50	0
Goldendoodle	49	0
Jack Russell Terrier	47	0
Beagle	46	0
Cairn Terrier	44	0
Mastiff	42	0
Nova Scotia Duck Tolling Retriever	39	0
Kooikerhondje	39	0
Coton de Tulear	39	0
Finnish Hound	37	0
Dutch Shepherd Dog - Longhaired	35	0
Australian Cattle Dog	33	0
Dutch Shepherd Dog - Shorthaired	33	0
English Springer Spaniel	32	0
Fox Terrier - Wire	32	0
American Staffordshire Terrier	32	0
Schapendoes	30	0
Shiba	30	0
Pumi	30	0
Bulldog	29	0
Russell Terrier	29	0
Curly Coated Retriever	28	0
Welsh Corgi Pembroke	27	0
Kromfohrländer	27	0
Alaskan Klee Kai	27	0
English Greyhound	27	0
Norrbottenspitz	26	0
Dachshund	26	0
Alaskan Malamute	25	0
Old English Sheepdog	25	0
American Bulldog	24	0
Chinese Crested Dog	24	0
American Hairless Terrier	23	0
West Highland White Terrier	23	0
Welsh Springer Spaniel	23	0
Boerboel	22	0
Russian Tsvetnaya Bolonka	21	0
Lancashire Heeler	19	0
Poodle (AKC)	19	0
Poodle (FCI)	19	0
Cirneco dell'Etna	18	0
Chinook	18	0
Dutch Shepherd Dog	18	0
Poodle - Miniature (AKC size standard)	18	0
Dachshund - Miniature Shorthaired	17	0
Welsh Corgi Cardigan	17	0
Mudi	16	0
German Shepherd Dog - Longhaired	16	0
American Pit Bull Terrier	16	0
Deutsch Drahthaar - German Wirehaired Pointer	16	0
Eurasier	16	0
Bernese Mountain Dog	15	0
Dachshund - Miniature Wirehaired	15	0
American Cocker Spaniel	15	0
Dalmatian	15	0
Collie	15	0
Windsprite (formerly Longhaired Whippet)	15	0
Stabyhoun	15	0
German Hunting Terrier	14	0
Borzoi	14	0
Australian Labradoodle	14	0
Papillon	13	0
Italian Greyhound	13	0
Weimaraner	13	0
Miniature Bull Terrier	12	0
Scottish Terrier	12	0
Volpino Italiano	12	0
Cane Corso	12	0
Poodle - Medium size (FCI size standard) - Black, brown and white	12	0
Poodle - Toy (AKC size standard)	12	0
Miniature Schnauzer	12	0
Chihuahua	12	0
Dobermann	11	0
Spanish Water Dog	11	0
Newfoundland	11	0
Pyrenean Mastiff	11	0
Tibetan Terrier	11	0
Poodle - Medium size (FCI size standard) - Grey, apricot and red	11	0
Northern Inuit	11	0
Bruno Saint-Hubert Francais	11	0
Yorkshire Terrier	10	0
Pug	10	0
Dutch Shepherd Dog - Rough-haired	10	0
Kai	10	0
Norfolk Terrier	9	0
Schipperke	9	0
Akita Inu	9	0
Pomeranian	9	0
Siberian Husky	9	0
Bolognese	9	0
Poodle - Standard (FCI size standard) - Grey, apricot and red	9	0
Poodle - Standard (FCI size standard) - Black, brown and white	9	0
Poodle - Miniature (FCI size standard) - Black, brown and white	9	0
Spanish Greyhound	9	0
Finnish Spitz	8	0
Pyrenean Sheepdog - Longhaired	8	0
Shih Tzu	8	0
Berger d'Auvergne	8	0
Belgian Shepherd Dog - Malinois	7	0
Toy Fox Terrier	7	0
Weimaraner - Shorthaired	7	0
Boston Terrier	7	0
Poodle - Miniature (FCI size standard) - Grey, apricot and red	7	0
Continental Toy Spaniel	7	0
Irish (Red) Setter	6	0
Dandie Dinmont Terrier	6	0
Chesapeake Bay Retriever	6	0
English Toy Terrier	6	0
Terrier Brazileiro	6	0
German Spitz - Medium size Spitz - Other colours	6	0
Prazsky Krysarik	6	0
American Bully	6	0
Thulean Miniature Husky	6	0
Entlebucher Mountain Dog	5	0
Large Münsterländer	5	0
Rottweiler	5	0
Pyrenean Mountain Dog or Great Pyrenees	5	0
Flat Coated Retriever	5	0
Basenji	5	0
Poodle - Toy (FCI size standard)	5	0
Afghan Hound	5	0
Dachshund - Shorthaired	5	0
American Indian Dog	5	0
Labrador Husky	5	0
Parti-colored Poodle	5	0
Beauceron	4	0
Cesky Terrier	4	0
Portuguese Podengo - Smooth-haired Miniature	4	0
Portuguese Podengo - Wirehaired Medium sized	4	0
Russian-European Laika	4	0
Boxer	4	0
Pyrenean Sheepdog - Smooth Faced	4	0
Irish Terrier	4	0
Petit Basset Griffon Vendeen	4	0
Slovakian Chuvach	4	0
Rat Terrier	4	0
Gordon Setter	4	0
Irish Wolfhound	4	0
Sloughi	4	0
Dachshund - Longhaired	4	0
Cataleoridge	4	0
Cockapoo	4	0
Peruvian Hairless Dog	4	0
Istrian Wirehaired Scent Hound	4	0
Bullmastiff	3	0
Portuguese Podengo - Wirehaired Miniature	3	0
Swedish Elkhound	3	0
Pharaoh Hound	3	0
Border Terrier	3	0
Icelandic Sheepdog	3	0
Field Spaniel	3	0
English Setter	3	0
Hungarian Short-Haired Pointer (Vizsla)	3	0
American Foxhound	3	0
Australian Kelpie	3	0
German Spitz - Miniature Spitz - Other colours	3	0
Japanese Spitz	3	0
Biewer Terrier	3	0
Deerhound	3	0
German Spitz	3	0
Golden Labrador Retriever	3	0
Dachshund - Standard Shorthaired	3	0
Working Jack Russell Terrier	3	0
Shiloh Shepherd	3	0
Picardy Sheepdog	2	0
Norwegian Lundehund	2	0
Dachshund - Rabbit Longhaired	2	0
Norwich Terrier	2	0
American Water Spaniel	2	0
Basset Fauve de Bretagne	2	0
West-Siberian Laika	2	0
Miniature Schnauzer - Black and silver	2	0
Manchester Terrier	2	0
Polish Greyhound	2	0
Miniature Schnauzer - Pepper and salt	2	0
Landseer	2	0
Polish Lowland Sheepdog	2	0
German Pinscher	2	0
Bearded Collie	2	0
Miniature Pinscher	2	0
Hokkaido	2	0
Bull Terrier	2	0
Dachshund - Rabbit Wirehaired	2	0
Dachshund - Rabbit Shorthaired	2	0
Hungarian Wire-Haired Pointer (Vizsla)	2	0
Azawakh	2	0
Griffon Belge	2	0
Dachshund - Wirehaired	2	0
Xoloitzcuintle	2	0
Great Dane	2	0
Bolonka	2	0
Schnauzer - Black	2	0
German Spitz - Medium size Spitz - White	2	0
Continental Bulldog	2	0
Olde Cape Mastiff	2	0
Maremma and Abruzzes Sheepdog	1	0
Dogue de Bordeaux	1	0
Belgian Shepherd Dog - Tervueren	1	0
Saint Bernard - Shorthaired	1	0
Tibetan Mastiff	1	0
Staffordshire Bull Terrier	1	0
Bichon Frise	1	0
Czechoslovakian Vlcak	1	0
American Eskimo Dog	1	0
Miniature Schnauzer - Black	1	0
Canaan Dog	1	0
Little Lion Dog or Löwchen	1	0
Phalene	1	0
Chow Chow	1	0
Leonberger	1	0
Schnauzer - Pepper and salt	1	0
Great Dane - Black and harlequin	1	0
Pekingese	1	0
Peruvian Hairless Dog - Medium sized	1	0
Sussex Spaniel	1	0
German Spitz - Medium size Spitz - Black and brown	1	0
Belgian Shepherd Dog - Groenendael	1	0
Fox Terrier - Smooth	1	0
Great Dane - Fawn and brindle	1	0
Mi-ki	1	0
Cavalier King Charles Spaniel	1	0
Akita	1	0
Pyrenean Sheepdog	1	0
Schnauzer	1	0
Welsh Sheepdog	1	0
Caucasian Shepherd Dog	1	0
Portuguese Podengo	1	0
Silken Windhound	1	0
Olde English Bulldogge	1	0
East-European Shepherd	1	0
German Spitz - Giant Spitz - Black and brown	1	0
Xoloitzcuintle - Intermediate	1	0
Mali Medimurski Pas	1	0
Central Asian Ovcharka	1	0
Greenland Dog	1	0
Sheepadoodle	1	0
Sprocker Spaniel	1	0
Blue Picardy Spaniel	1	0
Alpine Dachsbracke	1	0
Hygen Hound	1	0
Seskar	1	0
Total	6939	1
